# Supplementary material for: Sustainable electrochemical synthesis of aliphatic nitro- NNO -azoxy compounds employing ammonium dinitramide and their in vitro evaluation as potential nitric oxide donors and fungicides
Source: publisher site journal article supplement (doi:10.3762/bjoc.21.211), 2025-12-29

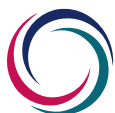

## Supporting Information

for

### **Sustainable electrochemical synthesis of aliphatic nitro-*NNO*-azoxy compounds employing ammonium dinitramide and their in vitro evaluation as potential nitric oxide donors and fungicides**

Alexander S. Budnikov, Nikita E. Leonov, Michael S. Klenov, Andrey A. Kulikov, Igor B. Krylov, Timofey A. Kudryashev, Aleksandr M. Churakov, Alexander O. Terent'ev and Vladimir A. Tartakovsky

*Beilstein J. Org. Chem.* **2025**, 21, 2739–2754. doi:10.3762/bjoc.21.211

## CheckCIF report for the data of 2c

## checkCIF/PLATON report

Structure factors have been supplied for datablock(s) akaschz70

THIS REPORT IS FOR GUIDANCE ONLY. IF USED AS PART OF A REVIEW PROCEDURE FOR PUBLICATION, IT SHOULD NOT REPLACE THE EXPERTISE OF AN EXPERIENCED CRYSTALLOGRAPHIC REFEREE.

No syntax errors found. CIF dictionary Interpreting this report

**Datablock: akaschz70**

Bond precision: C-C = 0.0018 Å

Wavelength=1.54184

```
Cell:      a=8.5283(1)
           alpha=74.054(1)
```

b=10.5437(1)      c=10.9886(2)  
beta=89.798(1)    gamma=86.786(1)

Temperature: 100 K

|                        | Calculated   |
|------------------------|--------------|
| Volume                 | 948.51 (2)   |
| Space group            | P -1         |
| Hall group             | -P 1         |
| Moiety formula         | C6 H10 N4 O5 |
| Sum formula            | C6 H10 N4 O5 |
| Mr                     | 218.18       |
| Dx, g cm <sup>-3</sup> | 1.528        |
| Z                      | 4            |
| Mu (mm <sup>-1</sup> ) | 1.163        |
| F000                   | 456.0        |
| F000'                  | 457.80       |
| h, k, lmax             | 10, 13, 14   |
| Nref                   | 4123         |
| Tmin, Tmax             | 0.691, 0.765 |
| Tmin'                  | 0.551        |

```
Reported
948.51 (2)
P -1
-P 1
C6 H10 N4 O5
C6 H10 N4 O5
218.18
1.528
4
1.163
456.0

10,13,14
4086
0.232,1.000
```

```
Correction method= # Reported T Limits: Tmin=0.232 Tmax=1.000
AbsCorr = GAUSSIAN
```

Data completeness= 0.991

$$\text{Theta (max)} = 79.655$$

R(reflections)= 0.0387( 3898)

```
wR2 (reflections)=  
0.0953 ( 4086)
```

$$S = 1.054$$

Npar= 320

Click on the hyperlinks for more details of the test.

PLAT430\_ALERT\_2\_B Short Inter D...A Contact 01 ..03B . 2.72 Ang.  
1-x,-y,2-z = 2\_657 Check

PLAT430\_ALERT\_2\_B Short Inter D...A Contact N1 ..03B . 2.78 Ang.  
1-x,-y,2-z = 2 657 Check

|                   |                                           |       |       |          |
|-------------------|-------------------------------------------|-------|-------|----------|
| PLAT906_ALERT_3_C | Large K Value in the Analysis of Variance | ..... | 2.074 | Check    |
| PLAT911_ALERT_3_C | Missing FCF Refl Between Thmin & STh/L=   | 0.600 |       | 4 Report |
|                   | 5 -9 3, 6 -8 3, 4 -9 4, 5 -8 4,           |       |       |          |

|                   |                                                  |        |        |
|-------------------|--------------------------------------------------|--------|--------|
| PLAT002_ALERT_2_G | Number of Distance or Angle Restraints on AtSite | 32     | Note   |
| PLAT003_ALERT_2_G | Number of Uiso or U(i,j) Restrained non-H-Atoms  | 2      | Report |
| PLAT154_ALERT_1_G | The s.u.'s on the Cell Angles are Equal ..(Note) | 0.001  | Degree |
| PLAT171_ALERT_4_G | The CIF-Embedded .res File Contains EADP Records | 15     | Report |
| PLAT176_ALERT_4_G | The CIF-Embedded .res File Contains SADI Records | 17     | Report |
| PLAT186_ALERT_4_G | The CIF-Embedded .res File Contains ISOR Records | 1      | Report |
| PLAT191_ALERT_3_G | A Non-default SADI Restraint Value has been used | 0.0030 | Report |
| PLAT191_ALERT_3_G | A Non-default SADI Restraint Value has been used | 0.0030 | Report |
| PLAT191_ALERT_3_G | A Non-default SADI Restraint Value has been used | 0.0030 | Report |
| PLAT191_ALERT_3_G | A Non-default SADI Restraint Value has been used | 0.0030 | Report |
| PLAT191_ALERT_3_G | A Non-default SADI Restraint Value has been used | 0.0030 | Report |
| PLAT191_ALERT_3_G | A Non-default SADI Restraint Value has been used | 0.0030 | Report |
| PLAT191_ALERT_3_G | A Non-default SADI Restraint Value has been used | 0.0030 | Report |
| PLAT191_ALERT_3_G | A Non-default SADI Restraint Value has been used | 0.0030 | Report |
| PLAT191_ALERT_3_G | A Non-default SADI Restraint Value has been used | 0.0030 | Report |
| PLAT191_ALERT_3_G | A Non-default SADI Restraint Value has been used | 0.0030 | Report |
| PLAT191_ALERT_3_G | A Non-default SADI Restraint Value has been used | 0.0030 | Report |
| PLAT191_ALERT_3_G | A Non-default SADI Restraint Value has been used | 0.0030 | Report |
| PLAT191_ALERT_3_G | A Non-default SADI Restraint Value has been used | 0.0030 | Report |
| PLAT191_ALERT_3_G | A Non-default SADI Restraint Value has been used | 0.0030 | Report |
| PLAT191_ALERT_3_G | A Non-default SADI Restraint Value has been used | 0.0030 | Report |
| PLAT191_ALERT_3_G | A Non-default SADI Restraint Value has been used | 0.0030 | Report |
| PLAT301_ALERT_3_G | Main Residue Disorder .....(Resd 1)              | 60%    | Note   |
| PLAT301_ALERT_3_G | Main Residue Disorder .....(Resd 2)              | 40%    | Note   |
| PLAT367_ALERT_2_G | Long? C(sp?)-C(sp?) Bond C7 - C8 .               | 1.51   | Ang.   |
| PLAT367_ALERT_2_G | Long? C(sp?)-C(sp?) Bond C7 - C12 .              | 1.51   | Ang.   |
| PLAT811_ALERT_5_G | No ADDSYM Analysis: Too Many Excluded Atoms .... | !      | Info   |

|                   |                                                      |       |      |
|-------------------|------------------------------------------------------|-------|------|
| PLAT860_ALERT_3_G | Number of Least-Squares Restraints .....             | 29    | Note |
| PLAT912_ALERT_4_G | Missing # of FCF Reflections Above STh/L= 0.600      | 33    | Note |
| PLAT969_ALERT_5_G | The 'Henn et al.' R-Factor-gap value .....           | 3.985 | Note |
|                   | Predicted wR2: Based on SigI**2 2.39 or SHELX Weight | 9.05  |      |
| PLAT978_ALERT_2_G | Number C-C Bonds with Positive Residual Density.     | 11    | Info |

---

0 **ALERT level A** = Most likely a serious problem - resolve or explain  
2 **ALERT level B** = A potentially serious problem, consider carefully  
2 **ALERT level C** = Check. Ensure it is not caused by an omission or oversight  
32 **ALERT level G** = General information/check it is not something unexpected

1 ALERT type 1 CIF construction/syntax error, inconsistent or missing data  
7 ALERT type 2 Indicator that the structure model may be wrong or deficient  
22 ALERT type 3 Indicator that the structure quality may be low  
4 ALERT type 4 Improvement, methodology, query or suggestion  
2 ALERT type 5 Informative message, check

---

It is advisable to attempt to resolve as many as possible of the alerts in all categories. Often the minor alerts point to easily fixed oversights, errors and omissions in your CIF or refinement strategy, so attention to these fine details can be worthwhile. In order to resolve some of the more serious problems it may be necessary to carry out additional measurements or structure refinements. However, the purpose of your study may justify the reported deviations and the more serious of these should normally be commented upon in the discussion or experimental section of a paper or in the "special\_details" fields of the CIF. checkCIF was carefully designed to identify outliers and unusual parameters, but every test has its limitations and alerts that are not important in a particular case may appear. Conversely, the absence of alerts does not guarantee there are no aspects of the results needing attention. It is up to the individual to critically assess their own results and, if necessary, seek expert advice.

### Publication of your CIF in IUCr journals

A basic structural check has been run on your CIF. These basic checks will be run on all CIFs submitted for publication in IUCr journals (*Acta Crystallographica*, *Journal of Applied Crystallography*, *Journal of Synchrotron Radiation*); however, if you intend to submit to *Acta Crystallographica Section C* or *E* or *IUCrData*, you should make sure that full publication checks are run on the final version of your CIF prior to submission.

### Publication of your CIF in other journals

Please refer to the *Notes for Authors* of the relevant journal for any special instructions relating to CIF submission.

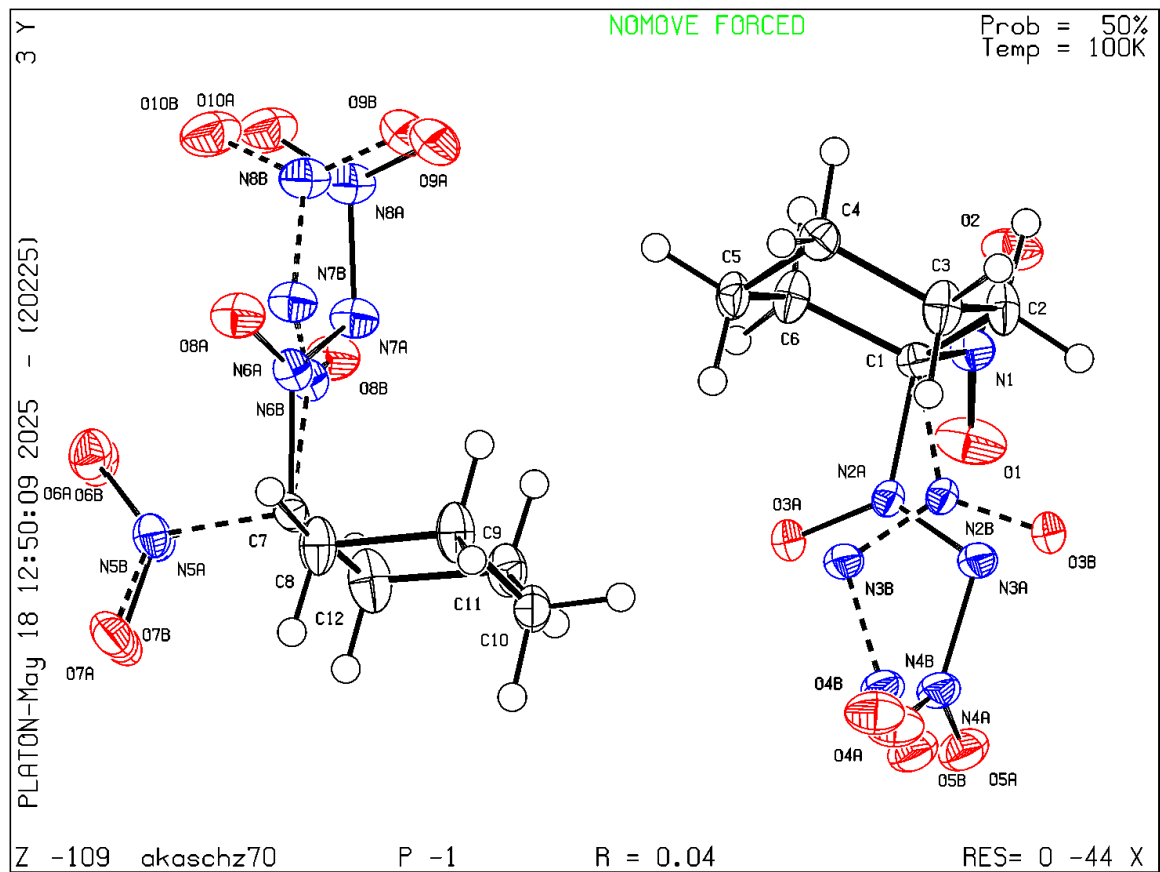

Supplement: Additional file 3 [file 1860-5397-21-211-S3.pdf]
